# Supplementary material
Source: publisher figshare collection journal article supplement (https://acs.figshare.com/ndownloader/files/4001110)
Supplement: Supplementary file 1 [file 4001110]

## Sheet: Table S4
	Table S4. List of m/z values and corresponding intensities measured by MALDI-TOF mass spectrometry for the ten different Roseobacter strains *
	O. batsensis HTCC2597												P. bermudensis HTCC2601												R. denitrificans OCh114												P. gallaeciensis 2.10												O. granulosus HTCC2516
	A1			A2			B1			B2			A1			A2			B1			B2			A1			A2			B1			B2			A1			A2			B1			B2			A1
	m/z	Intensity		m/z	Intensity		m/z	Intensity		m/z	Intensity		m/z	Intensity		m/z	Intensity		m/z	Intensity		m/z	Intensity		m/z	Intensity		m/z	Intensity		m/z	Intensity		m/z	Intensity		m/z	Intensity		m/z	Intensity		m/z	Intensity		m/z	Intensity		m/z
	1672.21	948.205		1670.8	278.656		1671.68	459.439		1671.8	597.922		1717.48	325.816		1722.73	239.87		1715.04	261.372		1674.52	225.415		1666.85	643.877		1671.48	364.855		1673.1	1442.09		1671.89	832.333		1674.63	273.06		1674.54	1118.49		1671.91	338.033		1728.28	201.517		1726.69
	1677.77	207.079		1672.02	262.647		1673.9	503.419		1727.19	357.575		1719.79	249.774		1725.7	393.954		1727.81	1030.32		1675.39	170.412		1670.54	217.769		1671.78	336.847		1705.21	415.092		1706.59	238.114		1681.7	240.83		1681.62	450.108		1675.45	500.96		1731.59	283.486		1728.31
	1678.62	182.053		1673.32	340.633		1731.63	480.748		1729.15	392.495		1730.47	658.579		1727.39	249.992		1735.18	226.304		1730.13	567.028		1696.76	169.81		1673.12	296.829		1730.34	1098.28		1729.78	1035.82		1683.68	382.728		1683.13	393.015		1677.43	473.899		1774.9	789.831		1728.99
	1679.33	180.024		1728.11	181.735		1741.62	262.405		1731.33	527.426		1730.78	650.557		1737.99	5984.15		1740.06	633.298		1744.12	3169.98		1697.45	148.738		1674.37	317.802		1744.36	1070.01		1743.36	655.816		1684.78	370.691		1686.08	243.818		1682.82	824.634		1779.74	191.038		1730.25
	1704.87	168.495		1729.43	241.695		1743.94	478.373		1740.66	240.224		1735.8	341.509		1747.08	243.124		1771.49	350.418		1752	309.984		1724.26	547.381		1730.56	764.573		1756.32	302.622		1753.82	234.078		1731.49	388.385		1687.97	196.611		1717.02	261.027		1804.3	177.637		1731.22
	1727.64	186.914		1731.68	233.632		1746.26	369.354		1743.14	480.208		1737.49	230.492		1749.56	251.073		1798.42	635.848		1774.86	858.192		1737.39	298.822		1744.68	224.032		1757.65	270.803		1755.16	223.182		1731.79	366.262		1688.68	249.545		1730.27	672.172		1806.24	242.804		1732.31
	1729.57	377.847		1732.96	147.6		1759.74	225.75		1745.75	246.203		1739.11	301.478		1768.33	1638.24		1801.44	293.93		1801.21	2708.93		1738.86	277.805		1774.83	1349.19		1774.89	3721.72		1756.29	289.289		1734.82	315.189		1729.3	292.276		1734.78	238.947		1807.99	179.971		1772.5
	1731.4	378.721		1733.65	144.583		1774.82	1553.33		1774.92	993.721		1740.88	325.468		1774.89	120.612		1802.5	255.96		1817.86	217.887		1740.17	251.798		1802.26	684.867		1801.6	2192.35		1757.01	290.368		1746.8	256.904		1731.71	363.124		1756.87	320.051		1818.05	176.992		1774.81
	1732.95	270.657		1734.65	153.564		1796.96	218.728		1798.67	271.943		1743.18	369.459		1795.23	5333.86		1820.05	219.551		1818.75	245.943		1753.05	175.256		1805.8	452.329		1815.35	193.588		1757.73	295.453		1774.84	976.657		1733.63	216.967		1757.87	261.115		1821.04	375.316		1818.53
	1733.33	253.628		1741.78	333.46		1798.67	395.274		1800.08	285.246		1745.1	435.455		1809.68	269.012		1830.42	231.018		1820.25	363.052		1754.18	226.345		1821.68	659.569		1816.11	239.545		1759	266.545		1803.06	217.502		1744.07	356.573		1774.82	2366.15		1830.48	182.462		1826.19
	1744.56	641.361		1743.33	267.451		1802.46	628.495		1801.37	566.589		1774.77	273.091		1815.69	1093.71		1841.51	342.625		1821.22	423.111		1768.99	1793.36		1825.38	303.903		1817.43	191.081		1774.71	4043.06		1807.13	439.141		1745.49	296.564		1804.7	642.886		1900.78	260.477		1898.52
	1749.07	200.352		1745.36	261.445		1818.1	233.165		1803.29	563.154		1799.55	362.992		1820.6	329.706		1843.22	362.764		1822.28	437.184		1774.95	180.716		1830.84	611.276		1820.57	851.891		1799.94	1107.02		1808.67	318.715		1746.44	262.564		1808.37	251.499		1902.47	266.784		1900.06
	1749.54	168.357		1747.24	136.447		1821.13	633.531		1805.49	598.64		1802.24	335.356		1826.88	752.325		1898.93	993.393		1823.46	308.284		1794.88	939.48		1901.81	1179.85		1830.65	1375.53		1807.05	298.265		1810.36	238.465		1747.45	303.571		1821.66	831.064		2081.93	208.641		1901.28
	1755.9	193.514		1758.72	172.657		1826.41	246.344		1822.19	872.559		1803.41	327.496		1830.59	296.548		1915.91	282.291		1832.88	474.014		1800.12	383.184		1958.64	273.583		1857.49	231.61		1821.55	947.123		1822.13	747.862		1757.8	361.036		1831.17	617.457		2083.17	268.888		1902.06
	1757.92	257.597		1774.74	767.604		1827.23	262.775		1826.43	217.251		1828.68	260.221		1852.44	271.998		1917.47	265.549		1880.86	225.011		1811.7	200.419		1959.71	273.499		1902.45	2221.83		1825.9	394.864		1826.17	455.099		1759.6	467.168		1902.18	2021.69		2085.02	282.228		2010.61
	1759.18	230.675		1779.46	183.081		1902.2	986.505		1827.7	233.619		1898.46	531.58		1853.5	249.805		1999.04	255.909		1884.87	276.887		1816.65	721.401		1960.67	273.299		1956.22	235.39		1830.21	860.543		1831.17	358.732		1774.85	3561.67		1959.54	682.244		2088.59	216.984		2011.39
	1760.03	206.726		1797.12	172.63		1908.53	212.369		1828.73	208.132		1900.76	725.395		1877.16	266.21		2002.84	222.392		1902.2	2622.99		1825.13	662.857		2011.68	222.096		1958.64	369.452		1901.1	1410.18		1832.19	404.304		1790.85	233.966		2013.78	345.309		2090.24	169.291		2012.29
	1774.92	2243.09		1798.27	294.769		1956.19	232.888		1829.38	263.368		1904.11	562.502		1896.52	5220.04		2006.01	226.599		1909.29	282.187		1829.14	165.768		2014.44	370.737		1961.58	406.308		2012.63	342.458		1903.24	735.702		1791.78	227.18		2015.89	318.338		2094.2	172.137		2014.32
	1797.72	245.511		1800.65	266.271		1959.84	447.53		1834.43	230.313		1906.37	309.443		1907.62	209.35		2012.36	686.155		1959.61	510.07		1891.08	192.426		2016.84	282.291		2012.82	193.942		2013.82	320.681		2012.34	236.948		1806.04	558.44		2084.64	413.231		2094.21	189.085		2014.9
	1801.49	684.728		1802.21	277.596		1960.4	409.245		1843.97	346.221		2013.42	406.891		1910.22	265.55		2081.36	280.989		2013.12	308.874		1896.28	1494.79		2088.77	585.986		2015.16	384.065		2014.47	317.514		2013.64	223.89		1821.87	1332.53		2087.6	416.227		2101.19	487.2		2015.53
	1802.72	624.25		1804.45	203.062		2082.14	306.701		1901.42	800.253		2015.36	393.211		1913.8	237.878		2084.22	596.489		2015.66	409.692		1949.67	147.631		2100.18	225.428		2088.6	969.008		2016.19	387.789		2084.25	429.576		1830.93	1319.81		2098.24	482.871		2105.7	177.251		2084.4
	1808.35	188.249		1804.8	196.195		2088.43	1109.43		2010.29	198.596		2083.9	256.022		1918.16	230.439		2087.99	265.695		2028.79	198.692		1950.43	213.339		2291.82	231.16		2092.69	270.31		2088.42	653.371		2086.37	523.189		1902.51	2182.71		2102.64	1033.6		2116.9	223.236		2098.16
	1821.05	597.454		1806.15	159.439		2098.64	540.565		2087.99	1021.05		2087.01	379.846		1919.08	314.574		2100.33	219.442		2030.78	228.37		1954.05	346.453		2294.08	291.732		2100.76	410.707		2092.25	276.081		2091.21	312.292		1914.2	198.663		2117.71	285.166		2472.41	180.962		2150.62
	1823.21	535.521		1806.79	154.576		2101.64	586.748		2094.81	200.143		2090.03	264.207		1921.79	479.019		2181.51	251.952		2031.52	231.07		1956.38	150.707		2297.1	282.106		2104.65	349.389		2100.35	451.054		2093.28	347.696		1915.64	216.531		2119.67	331.916		2483.74	180.74		2298.39
	1826.82	175.427		1819.1	270.522		2112.62	216.396		2100.83	783.453		2186.54	378.61		1923.75	462.35		2183.65	337.354		2070.06	548.831		2009.34	175.803		2298	306.933		2115.51	213.129		2102.81	528.753		2102.73	1354.46		1916.7	209.779		2224.65	372.856		2485.38	288.88		2299.25
	1827.66	271.806		1820	343.755		2114.02	218.444		2109.39	203.316		2197.9	219.907		1953.74	753.641		2184.36	322.72		2086.98	1234.47		2011.07	230.14		2299.05	239.704		2116.84	264.398		2116.37	241.656		2114.23	382.822		1917.21	198.184		2227	371.452		2488.13	259.137		2470.35
	1828.33	261.06		1821.07	350.041		2116.17	264.502		2113.72	240.468		2285.55	246.836		1967.98	285.208		2280.53	231.799		2099.97	323.954		2013.64	147.545		2350.63	325.524		2119.94	339.404		2117.67	261.021		2118.05	672.314		1917.51	217.559		2240.62	720.353		2577.64	160.396		2489.62
	1830.58	427.353		1828.94	159.034		2117.26	259.524		2116.32	216.128		2299.65	252.602		1969.43	410.16		2284.33	221.648		2102.1	333.061		2082.99	688.775		2352.91	254.277		2121.24	342.797		2118.91	267.215		2123.61	274.232		1918.91	220.277		2290.16	304.952		2583.69	434.787		2497.25
	1901.49	1097.7		1844.47	139.079		2118.18	242.549		2119.07	221.83		2352.27	413.806		2008.99	329.496		2291.89	317.461		2104.06	237.629		2095.67	198.901		2353.98	268.168		2197.09	276.203		2120.39	223.594		2124.98	281.443		1933.74	333.228		2292.95	414.991		2849.19	161.748		2726.48
	1955.1	183.693		1901.27	646.513		2201.84	209.911		2290.1	278.291		2370	306.896		2010.69	238.296		2293.35	347.688		2283.1	181.683		2097.01	166.982		2368.74	458.006		2212.13	204.909		2121.37	232.839		2129.29	222.022		1935.06	261.9		2296.26	362.083		2851.21	168.982		2727.81
	1959.98	501.738		1930.66	131.663		2205.5	250.472		2293.22	366.526		2410.81	221.101		2023.14	205.998		2296.23	329.265		2284.11	240.21		2126.1	152.994		2371.73	319.842		2215.21	217.404		2213.77	217.51		2220.78	378.587		1935.77	205.686		2297.3	330.116		3128.87	811.98		2729.46
	2015.11	218.114		1957.49	169.195		2214.74	226.392		2295.92	358.749		2413.36	224.137		2026.16	318.522		2298.59	288.867		2286.28	170.6		2187.42	169.485		2488.3	490.96		2215.38	228.326		2291.58	219.53		2222.57	326.732		1956.48	390.316		2299.24	321.193		3141.42	187.912		2731.09
	2015.75	217.461		1958.5	151.566		2288.98	336.182		2299.68	252.018		2425.77	226.483		2050.55	247.767		2300.98	305.174		2288.97	202.306		2287.8	212.25		2490.49	385.799		2219.18	212.889		2293.44	237.131		2224.99	375.838		1959.35	696.002		2306.04	329.568		3289.36	168.895		2732.69
	2016.42	217.771		1959.24	138.861		2291.59	226.116		2302.97	213.265		2428.5	584.859		2064.72	825.162		2333.21	229.558		2291.03	248.563		2290.19	184.445		2493.23	260.196		2290.19	257.505		2297.28	239.466		2237.38	311.067		1962.18	343.895		2307.89	325.681		3419.52	284.203		2764.13
	2089.42	1038.05		1960.27	177.205		2293.34	266.088		2303.22	204.319		2431.67	463.292		2081.61	2495.32		2351.09	558.924		2296.48	411.659		2294.16	148.111		2532.21	329.07		2291.87	302.309		2303.08	215.42		2241.07	438.429		1963.06	300.959		2310.08	433.841		3422.61	221.758		2837.57
	2101.28	675.282		2015.95	183.407		2296.53	438.043		2306.18	217.529		2434.7	412.628		2094.64	925.291		2364.84	378.557		2300.38	292.804		2301.41	279.239		2534.22	435.456		2294.4	222.786		2305.39	270.147		2291.48	243.455		2086.35	650.748		2311.29	398.03		3422.68	209.677		2844.84
	2116.3	213.867		2016.94	159.633		2299.13	343.017		2308.29	225.687		2455.51	280.071		2097.17	871.081		2367.66	327.871		2307.55	269.619		2302.94	248.517		2559.07	508.235		2295.79	220.329		2306.53	352.729		2292.55	268.632		2088.69	486.716		2368.41	272.574		3602.44	187.63		2846.18
	2117.34	198.945		2083.26	335.548		2300.88	395.012		2309.42	205.778		2460.42	278.365		2272.55	207.648		2369.54	249.185		2308.88	270.102		2304.45	222.777		2780.6	223.657		2305.25	219.437		2308.11	238.318		2293.55	253.885		2094.6	253.164		2368.77	252.808		3607.68	380.4		2847.17
	2119.19	264.287		2087.9	491.645		2302.75	258.012		2310.94	226.887		2463.35	411.635		2276.89	213.24		2467.12	288.709		2312.22	377.643		2364.3	428.972		2930.34	234.298		2306.61	402.361		2354.13	266.104		2295.07	376.186		2101.78	2322.39		2371.02	257.284		3621.21	504.78		2854.4
	2212.99	179.067		2091.22	254.72		2307.57	324.056		2350.25	259.885		2466.69	495.076		2277.24	207.497		2487.58	235.955		2321.12	170.474		2465.9	153.486		2933.73	358.301		2307.5	392.92		2355.1	236.591		2296.63	255.537		2111.52	263.241		2399.83	460.483		3668.34	248.1		2858.22
	2217.05	235.489		2092.81	236.738		2309.72	410.093		2353.4	384.3		2470.9	336.912		2279.02	204.048		2851.49	509.364		2324.85	196.202		2467.46	157.33		2935.28	321.312		2309.9	308.481		2366.21	210.55		2299.66	217.16		2117.78	1165.36		2470.49	494.861		3673.8	405.113		2861.57
	2291.49	245.793		2094.73	154.756		2313	413.169		2368.25	472.367		2473.19	262.427		2288.89	660.317		2857.96	243.572		2327.36	271.3		2477.57	163.558		3103.68	647.924		2310.96	333.007		2367.25	217.869		2302.51	240.814		2125.38	257.189		2473.02	468.427		3679.31	198.247		2863.63
	2292.78	254.176		2100.24	306.767		2314.45	311.213		2472.42	306.47		2576.06	879.754		2293.65	420.686		2863.99	570.742		2329.79	288.482		2480.38	316.148		3394.58	612.828		2312.23	319.973		2370.54	244.72		2307.77	310.053		2140.04	216.873		2489.43	1085.84		3825.37	196.007		2865.47
	2295.87	294.919		2101.9	277.761		2352.67	615.302		2482.51	284.977		2850.62	334.905		2295.12	246.144		3134.49	220.932		2336.66	716.083		2483.12	523.509		3403.53	222.522		2313.3	291.754		2475.87	258.858		2312.74	247.221		2222.35	392.401		2584.55	551.078		3828.75	215.578		2869.98
	2298.7	186.844		2103.92	201.743		2352.95	581.77		2483.64	293.396		2853.07	350.858		2302.29	212.617		3242.1	342.42		2342.32	300.885		2488.72	183.542		3623.69	458.767		2353.2	225.132		2483.52	323.621		2467.65	256.755		2225.2	420.322		2586.96	563.055		4030.8	238.279		2871.1
	2299.64	174.171		2292.18	135.184		2358.5	233.332		2489.07	439.881		2857.73	291.73		2304.47	482.316		3247.03	222.551		2345.64	302.375		2553.96	214.229		3713.68	223.154		2356.11	210.671		2488.39	478.358		2468.86	378.306		2227.2	294.112		2590.64	269.491		4251.02	165.397		2871.23
	2300.78	176.502		2293.12	170.218		2368.31	839.088		2573.27	233.297		2859.64	292.648		2306.32	459.982		3287.03	298.209		2352.57	2159.97		2849.77	149.084		3815.6	715.966		2369.64	582.945		2494.32	328.991		2472.39	474.969		2242.09	741.831		3133.38	784.621		4253.44	184.819		2875.38
	2302.2	203.879		2293.92	139.248		2375.31	241.536		2578.77	256.025		2861.91	348.572		2310.05	386.653		3288.79	247.318		2369.18	1878.36		2931.05	172.253		3822.92	210.839		2471.76	316.246		2561.94	223.982		2476.14	288.786		2245.69	261.118		3139.18	355.297		4255.1	202.346		2888.77
	2305.09	176.73		2294.92	142.292		2453.98	216.938		2725.51	217.291		2866.56	664.339		2313.04	253.353		3296.29	1216.68		2378.77	209.405		2932.68	161.437		4049.86	275.249		2476.67	234.947		2866.49	218.679		2482.05	281.614		2256.95	195.097		3142.17	253.003		4260.96	310.024		3087.43
	2306.18	223.076		2299.58	131.493		2465.6	256.002		2728.23	211.811		2878.98	221.529		2316.57	219.077		3306.71	281.437		2379.09	196.955		3095.49	209.976		4052.58	304.061		2477.97	243.915		2934.95	263.773		2483.16	416.112		2258.97	268.004		3612.22	372.211		4266.02	464.862		3092.48
	2309.25	259.867		2306.61	171.862		2466.45	237.566		2730.85	229.296		3268.12	289.999		2318.93	265.564		3310	334.654		2381.79	206.64		3099.71	306.674		4056.5	226.375		2479.21	289.527		3101.07	308.817		2489.19	701.95		2263.08	243.896		3623.8	441.743		4277.89	1844.66		3377.99
	2311.78	305.765		2307.9	152.958		2467.56	266.134		3118.37	455.407		3270.1	327.97		2322.17	215.054		3312.42	279.829		2385.17	288.873		3104.43	158.644		4254.94	260.187		2488.69	774.885		3104.78	380.394		2584.12	235.81		2264.72	204.678		3678.38	261.989		4297.67	181.5		3383.92
	2314.82	216.824		2309.49	195.058		2470.03	429.914		3391.16	215.382		3272.26	307.939		2322.3	201.664		3314.59	277.943		2386.63	242.474		3390.33	315.42		4261.76	347.693		2538.35	200.239		3395.79	347.177		2585.56	246.385		2290.56	243.176		3679.54	247.254		4299.09	181.297		3386.01
	2350.8	278.153		2314.49	170.395		2472.14	393.451		3701.03	232.67		3279.98	223.834		2325.05	201.072		3317.44	225.231		2387.97	184.021		3396.76	177.84		4269.36	553.896		2541.45	201.008		3818.36	308.82		3126.19	251.392		2296.03	217.53		3831.93	723.96		4766.51	371.731		3895.25
	2352.09	337.571		2315.62	153.481		2476.78	225.419		3980.28	203.636		3282.1	251.809		2328.49	717.43		3319.36	249.378		2389.95	211.732		3619.79	146.684		4282.51	2153.7		2558.2	369.503		4054.67	216.143		3131.28	575.934		2296.89	210.079		4034.98	252.374		4775.55	198.718		3954.49
	2353.37	420.113		2351.78	277.427		2477.54	210.884		4263	206.346		3286.03	287.766		2331.38	868.966		3321.67	235.571		2395.94	243.003		3621.54	161.834		4299.49	400.127		2559.81	278.322		4255.85	272.195		3134.67	490.407		2299.44	327.614		4262.5	308.473		5036.72	378.449		3956.11
	2369.27	481.882		2368.83	288.085		2488.5	984.841		4267.85	198.879		3288.51	255.74		2347.51	2766.01		3425.82	626.216		2448.12	170.955		3814.88	310.703		4309.93	232.739		2852.46	248.454		4262.35	347.586		3610.24	254.858		2303.31	200.956		4264.68	304.052		5043.09	178.016		3957.93
	2384.25	212.288		2371.76	234.668		2727.64	305.689		4282.8	1072.92		3297.09	1114.69		2363.6	2274.82		3432.4	270.729		2468.63	266.588		3818.62	151.021		4792.86	288.437		2855.26	259.742		4283.67	3195.18		3612.71	227.634		2306.55	337.901		4283.77	2361.99		5110.25	176.251		3959.1
	2402.23	181.63		2468.02	173.272		2730.62	332.155		4296.58	310.988		3311.64	311.691		2374.48	216.266		3433.35	251.9		2470.09	290.333		4118.56	150.43		4796.37	243.941		2858.23	209.152		4304.91	240.127		3673.87	253.547		2309.52	319.877		4772.45	309.822		5117.25	198.471		4103.77
	2468.83	240.519		2470.56	148.311		2732.56	443.576		4298.95	257.889		3314.98	276.72		2376.35	300.186		3768.89	735.492		2471.53	261.086		4256.67	153.982		5052.82	374.209		2931.58	265.217		4789.56	229.646		3675.59	236.842		2309.97	309.331		4774.71	297.498		5122.92	275.723		4104.77
	2471.09	288.704		2473.33	142.428		2737.66	212.344		4303.2	196.732		3317.49	296.748		2381.62	428.017		4115.54	385.387		2473.04	246.923		4262.66	167.005		5069.01	1630.14		2933.12	285.348		4790.65	218.249		3680.1	221.867		2311.99	326.334		5042.99	670.235		5129.17	250.279		4110.55
	2473.31	265.729		2474.36	134.917		2784.67	238.896		4715.11	257.664		3320.19	251.797		2383.31	321.936		4118.18	401.729		2474.3	258.537		4268.11	292.354		5089.13	262.275		2934.39	280.446		4967.86	315.428		3830.58	367.363		2313.56	216.253		5130.13	326.694		5134.91	285.846		4112.48
	2487.77	712.001		2486.38	449.041		2856.5	224.305		4923.86	852.839		3322.15	218.814		2384.41	242.549		4120.78	367.051		2487.54	474.643		4280.26	1301.54		5096.72	214.982		2934.51	259.768		4971.33	346.804		4260.28	227.858		2369.6	194.919		5134.98	257.727		5140.38	285.502		4119.08
	2495.41	216.772		2494.29	157.649		3121.34	296.635		5053.62	223.185		3424.65	391.745		2425.39	218.647		4257.34	245.03		2491.79	288.216		4295.33	206.53		5103.96	490.544		3104.06	529.892		4974.7	220.64		4263.42	281.608		2398.28	270.721		5141.68	326.077		5165.09	2111.99		4131.53
	2727.65	216.668		4257.98	153.992		3122.71	262.861		5053.93	213.261		3427.35	441.305		2464.31	452.14		4260.58	315.449		2493.08	249.003		4792.25	153.247		5118.8	3249.5		3104.51	491.378		5070.17	732.804		4270.37	362.185		2470.77	339.773		5147.41	266.241		5193.75	187.796		4226.03
	2730.42	200.413		4259.29	138.824		4254.91	274.869		5056.38	220.466		3703.04	256.715		2466.86	318.297		4265.64	465.182		2728.81	182.838		5051.39	147.162		5130.73	396.567		3395.5	396.75		5120.05	1262.7		4282.05	1557.62		2473.72	389.604		5172.42	3480.9		5195.93	176.508		4228.44
	2731.77	187.053		4260.79	156.635		4283.77	2209.79		5056.38	232.381		3769.5	734.408		2468.49	272.81		4281.54	3008.57		2856.1	175.625		5067.35	582.617		5342.02	254.2		3402.6	222		5735.51	1139.22		4296.49	338.187		2488.68	842.825		5199.3	308.292		5369.14	423.662		4241.28
	2732.02	178.265		4268.8	161.758		4307.67	304.927		5126.54	246.612		3776.88	270.739		2469.15	284.507		4304.09	366.995		2865.21	209.872		5075.88	269.041		5735.04	1658.59		3626.99	220.404		5851.12	278.794		5127.41	234.752		2495.53	306.773		5376.59	377.176		5731.6	130.678		4242.99
	2734.62	180.311		4272.41	240.352		4310	264.481		5131.51	263.197		3901.74	438.288		2470.09	208.349		4306.98	284.818		2866.9	187.175		5078.02	209.397		5747.44	245.922		3813.57	313.387		5869.26	1648.88		5140.66	259.611		2810.86	195.023		5737.27	1481.61		5734.36	79.9213		4244.2
	2784.71	172.084		4281.73	826.604		4717.71	349.415		5136.34	254.738		3906.95	299.403		2482.12	589.397		4985.32	258.7		3288.36	177.79		5081.94	178.288		5841.28	219.57		3817.57	358.892		6151.68	213.811		5144.39	222.64		2812.31	201.65		6181.54	919.069		6173.7	368.708		4246.12
	2855.28	178.622		4293.17	195.474		4923.94	880.051		5148.87	418.777		4052.97	403.058		2572.76	208.194		4989.28	224.827		3289.48	177.028		5082.97	151.532		5867.69	2292.32		4053.57	220.125		6157.74	343.7		5147.55	227.697		2814.09	223.327		6266.31	4559.6		6181.22	190.192		4247.17
	4254.31	173.381		4293.54	192.413		5157.42	567.658		5155.23	696.948		4056.85	266.516		2574.67	268.044		5176.99	311.068		3296.74	583.377		5100.1	148.379		5885.77	297.609		4055.78	210.839		6163.04	346.621		5168.02	1260.72		2815.1	261.664		6293.23	239.594		6183.39	162.78		4251.7
	4257.96	267.747		4299.03	162.053		5163.66	237.37		5462.56	275.297		4058.96	218.848		2575.71	247.03		5179.64	294.01		3308.27	188.521		5102.75	146.328		5890.25	250.197		4056.21	195.68		6181.35	1627.25		5182.3	261.036		3128.95	224.598		6297.14	269.215		6213.92	163.189		4283.48
	4262.46	346.996		4303.31	136.776		5163.76	217.755		5465.68	208.131		4228.01	243.048		2862.7	265.936		5348.15	393.847		3316.74	172.029		5105.15	154.199		6178.62	1907.69		4260.58	286.55		6208.76	2117.1		5375.06	455.463		3130.92	202.027		6299.74	266.666		6258.09	2703.38		4310.21
	4282.53	2150.91		4921.54	346.582		5464.48	232.971		5734.81	128.872		4255.51	256.434		2863.52	231.967		5735.16	2765.44		3319.11	171.553		5118.31	1140.58		6207.84	3703.92		4269.95	455.942		6223.1	351.294		5734.45	235.924		3132.83	222.459		6443.11	479.267		6436.76	258.072		4312.15
	4297.17	356.985		4929.98	161.207		5737.48	499.802		5740.37	155.706		4265.26	539.042		2865.11	222.025		5853.34	232.823		3425.42	261.729		5735.02	327.814		6232.31	223.317		4283.18	3055.82		6227.75	217.94		6178.77	341.608		3831.68	578.765		6583.95	1044.75		6576.28	760.598		4316.04
	4300.85	217.588		5152.86	190.187		6164.63	274.642		6166.21	219.299		4282.08	2594.9		2866.19	245.063		6180.15	1620.7		3426.65	260.909		5854.91	167.758		6730.68	235.027		4971.07	433.394		6228.63	211.055		6182.04	249.245		3838.06	206.446		6599.37	273.433		6590	168.09		4318.74
	4304.9	214.21		5156.09	156.927		6181.49	1034.7		6169.58	232.35		4308.49	296.989		3289.34	218.128		6268.5	548.97		3428.84	233.329		5867.64	878.963		6737.04	332.428		4978.99	192.02		6741.03	235.82		6221.75	309.549		4269.9	222.907		6848.15	887.203		6822.25	161.671		5182.66
	4306.87	217.06		5156.38	144.093		6201.84	346.479		6180.41	672.38		4987.52	420.754		3294.74	607.904		6441.73	235.076		3768.81	273.169		5882.06	144.425		6747.4	396.636		5070.55	602.321		6742.98	215.654		6230.01	218.021		4282.77	1122.45		6862.88	276.086		6839.26	538.608		5720.15
	4922.56	530.981		5735.33	235.622		6239.44	1058.36		6202.64	264.973		5735.45	6018.23		3319.05	237.091		6488.81	990.522		4260.06	328.247		6154.34	148.993		6752.93	405.05		5120.89	1372.11		6773.19	242.15		6234.83	231.275		4296.74	249.977		7191.24	267.472		6851.74	216.227		5722.23
	5734.85	479.753		6163.98	144.031		6785.31	1037.76		6221.15	229.773		6178.26	567.167		3767.07	239.238		6530.06	246.168		4281.54	2009.31		6161.65	214.145		6755.16	396.772		5737.12	493.954		6789.13	1151.04		6263.32	2868.04		5171.07	350.191		7207.08	369.136		7197.58	255.341		5724.92
	6156.67	200.996		6166.27	134.622		7328.63	289.79		6238.71	1663.93		6489.02	241.668		3767.37	218.473		6539.44	439.287		4303.87	273.211		6168.02	310.453		6788.08	2347.62		5870.14	1539.82		6992.83	582.724		6442.66	484.6		5737.37	452.771		7223.42	1195.57		7216.13	858.64		5736.7
	6161.29	297.015		6168.7	142.997		7338.98	258.74		6769.77	197.773		6491.71	225.09		4260.79	207.843		6545.83	382.872		5179.75	277.924		6179.94	682.448		6813.77	218.045		6163.9	285.394		7250.78	556.589		6566.1	226.431		6181.3	396.21		7247.72	2218.86		7239.86	1160.43		5754.15
	6167.27	375.78		6181.34	471.375		7393.22	432.853		6772.46	197.687		6519.8	248.216		4263.97	220.457		6554.94	419.644		5734.97	1638.52		6208.13	1368.49		6992.34	866.753		6180.93	1037.88		7428.58	378.028		6582.2	918.934		6265.8	1178.01		7355.76	1574.49		7327.21	275.907		5756.03
	6180.56	1358.56		6196.96	173.913		8040.65	216.846		6784.65	1126.07		6522.48	273.904		4265.45	243.292		6562.57	404.422		6178.01	398.413		6227.64	150.556		7231.38	307.54		6209.46	1889.16		7633.37	1092.73		6593	265.882		6279.71	263.61		7382.5	368.563		7348.58	1088.95		5759.12
	6202.57	168.033		6199.69	174.523		8565.97	9620.56		7329.2	212.445		6526.18	396.581		4267.02	273.131		6597.43	3844.9		6265.45	360.788		6774.57	189.202		7249.35	1138.65		6226.09	275.052		8107.45	413.378		6837.78	222.482		6443.43	269.778		7660.42	236.449		7373.41	289.906		5761.53
	6238.22	309.61		6238.9	255.332		8606.27	318.32		7339.08	214.904		6541.05	1153.58		4280.86	1602.91		6635.44	311.787		6488.06	598.219		6788.39	739.051		7426.99	406.745		6790.08	1027.84		8510.67	229.642		6846.36	400.796		6584.17	457.709		7668.78	376.196		7382.08	162.598		5766.45
	6243.08	203.493		6783.79	295.281		8859.79	261.737		7390.97	458.174		6596.76	3401.7		5735.14	1507.51		6730.71	293.33		6549.42	189.845		6799.26	277.354		7594.92	254.626		6800.61	281.769		8565.19	9264.25		7093.8	317.702		6848.47	330.287		7679.38	254.501		7660.53	290.256		6181.28
	6784.1	414.481		7389.14	149.478		9351.84	218.458		7740.6	196.092		6729.6	286.439		6180.28	384.794		6855.84	1227.6		6551.58	190.882		6805.17	219.014		7599.65	231.163		6805.22	296.785		8834.05	232.265		7219.9	382.197		7248.43	457.34		7684.84	245.824		7668.6	273.103		6207.97
	7394.87	216.816		8510.87	137.601		9388.97	233.454		7959.45	310.829		6855.59	746.728		6581.17	312.678		7153.99	228.778		6558.71	220.998		6992.33	447.146		7632.46	1957.76		6993.88	531.056		8878.75	229.852		7230.48	215.053		7356.24	642.592		8071.78	434.654		8065.42	272.603		6219.97
	8509.3	218.23		8565.26	3747.22		9396.07	209.782		8566.27	4344.87		6869.1	220.994		6597.59	1585.16		7526.05	272.507		6564.45	229.131		7001.75	175.991		8106.27	532.34		7251.11	531.275		9115.34	212.099		7245.91	576.092		7369.91	256.646		8153.6	247.597		8503.08	158.162		6219.98
	8565.7	7428.63		8599.58	231.471		9409.83	234.669		9420.09	203.523		7412.92	357.297		6616.2	219.356		7528.53	278.67		6595.81	1803.07		7006.75	144.517		8510.67	296.838		7428.13	335.213		9583.37	272.696		7314.83	214.33		7375.77	320.72		8156.67	245.492		8505.2	179.747		6744.05
	8604.32	188.269		8604.02	149.222		9418.78	247.58		9427.71	353.06		7518.82	238.56		6855.21	229.905		7541.21	1220.74		6623.16	176.684		7250.67	388.651		8565.44	5665.05		7634.85	1004.9		9585.54	253.735		7321.89	306.677		7382.18	383.672		8565.96	9166.3		8515.31	453.865		6747.94
	9806.54	173.753		8604.11	157.676		9428.22	405.406		9795.92	203.429		7540.15	1213.29		6856.85	215.286		7803.63	230.286		6627.61	182.999		7632.97	607.629		8878.75	269.451		8108.28	268.286		9934.75	707.231		7353.72	1419.13		8518.71	232.233		8600.03	441.283		8559.45	4400.42		6758.8
	9814.08	241.905		9820.05	165.583		9786.02	312.562		9806.1	307.402		7559.93	223.247		7541.33	305.353		7806.67	257.653		6854	679.806		8106.9	160.189		9116.02	278.857		8566.36	6825.83		9948.73	413.386		7382.76	453.268		8520.85	237.244		8683.12	315.541		8677.22	207.31		6771.38
	9846.54	1432.63		9845.63	818.174		9845.79	2541.19		9845.99	1946.92		7804.26	635.049		8523.87	240.18		8525.63	317.216		7526.64	172.742		8509.51	164.314		9584.53	294.093		8603.58	234.846		12312.8	239.36		8510.17	278.12		8529.89	279.909		9545.98	445.258		9540.21	255.758		8507.96
	12308.6	183.877		12316	138.127		10927	229.123		9874.35	277.077		8565.02	5424.61		8526.43	247.168		8566.12	4909.08		7538.8	514.518		8514.37	203.628		9935.38	479.527		8880.09	236.965		12317.7	265.17		8564.39	5683.7		8566.01	4479.49		10327.4	300.108		10322.9	282.946		8566.79
	12316.7	296.68		12334.8	189.478		12306.2	220.082		10917.8	199.177		8602.95	276.426		8526.46	255.363		9976.31	216.883		8506.92	183.612		8566.21	3294.03		9953.25	282.821		9935.07	492.788		12320.7	260.084		10327.2	274.565		8603.65	232.642		10738.6	311.995		10748.5	359.718		8612.49
	12323.6	314.719		12359.6	893.574		12316.4	386.683		10926.4	304.527		9975.28	346.401		8565.94	3371.08		10697	325.859		8565.06	6714.28		12341.3	159.336		12316.7	266.741		9948.77	315.754		12326.8	298.039		10751.1	455.507		12360	715.013		10751.3	727.899		12361	384.569		12316.4
	12361.4	1996.49		12391.6	158.842		12359.7	2176.71		12360.8	884.458		12360.4	250.448		12360.9	200.914		12360.9	1134.46		12361.3	346.475		12361.4	478.095		12360.5	1714.46		12360.2	796.388		12359.3	1533.48		12361.5	551.948		12373.3	344.227		12359.6	1594.48		12378.1	209.617		12358.7
	* A and B correspond to the two biological duplicates; 1 and 2correspond to technical duplicates
[truncated: 47 more columns]
